# Supplementary material
Source: MDPI journal article supplement (https://www.mdpi.com/2571-8789/5/2/26)
Supplement: s1 [file s1]

## Article

# Characterization of Plant Growth-Promoting Traits and Inoculation Effects on *Triticum durum* of Actinomycetes Isolates under Salt Stress Conditions

Rihab Djebaili <sup>1,2</sup>, Marika Pellegrini <sup>2,\*</sup>, Massimiliano Rossi <sup>3</sup>, Cinzia Forni <sup>3</sup>, Maria Smati <sup>1</sup>, Maddalena Del Gallo <sup>2,\*</sup> and Mahmoud Kitouni <sup>1</sup>

<sup>1</sup> Laboratory of Microbiological Engineering and Applications, Chaâbat Erssas Campus, University of Brothers Mentouri Constantine 1, Ain El Bey Road, 25000 Constantine, Algeria; djebaili.rihab@umc.edu.dz (R.D.); mariasmati87@gmail.com (M.S.); mahmoudkitouni@yahoo.fr (M.K.)

<sup>2</sup> Department of Life, Health and Environmental Sciences, University of L'Aquila, Coppito, 67010 L'Aquila, Italy

<sup>3</sup> Department of Biology, University of Rome "Tor Vergata", 00133 Roma, Italy; massimiliano87rossi@hotmail.com (M.R.); forni@uniroma2.it (C.F.).

\* Correspondence: marika.pellegrini@univaq.it (M.P.); maddalena.delgallo@univaq.it (M.D.G.)

**Citation:** Djebaili, R.; Pellegrini, M.; Rossi, M.; Forni, C.; Smati, M.; Del Gallo, M.; Kitouni, M. Characterization of Plant Growth-Promoting Traits and Inoculation Effects on *Triticum durum* of Actinomycetes Isolates under Salt Stress Conditions. *Soil Syst.* **2021**, *5*, 26. <https://doi.org/10.3390/soilsystems5020026>

Academic Editor: Holger Heuer

Received: 3 March 2021

Accepted: 8 April 2021

Published: 10 April 2021

**Publisher's Note:** MDPI stays neutral with regard to jurisdictional claims in published maps and institutional affiliations.

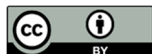

**Copyright:** © 2021 by the authors.

Submitted for possible open access

publication under the terms and

conditions of the Creative Commons

Attribution (CC BY) license

(<http://creativecommons.org/licenses/by/4.0/>).

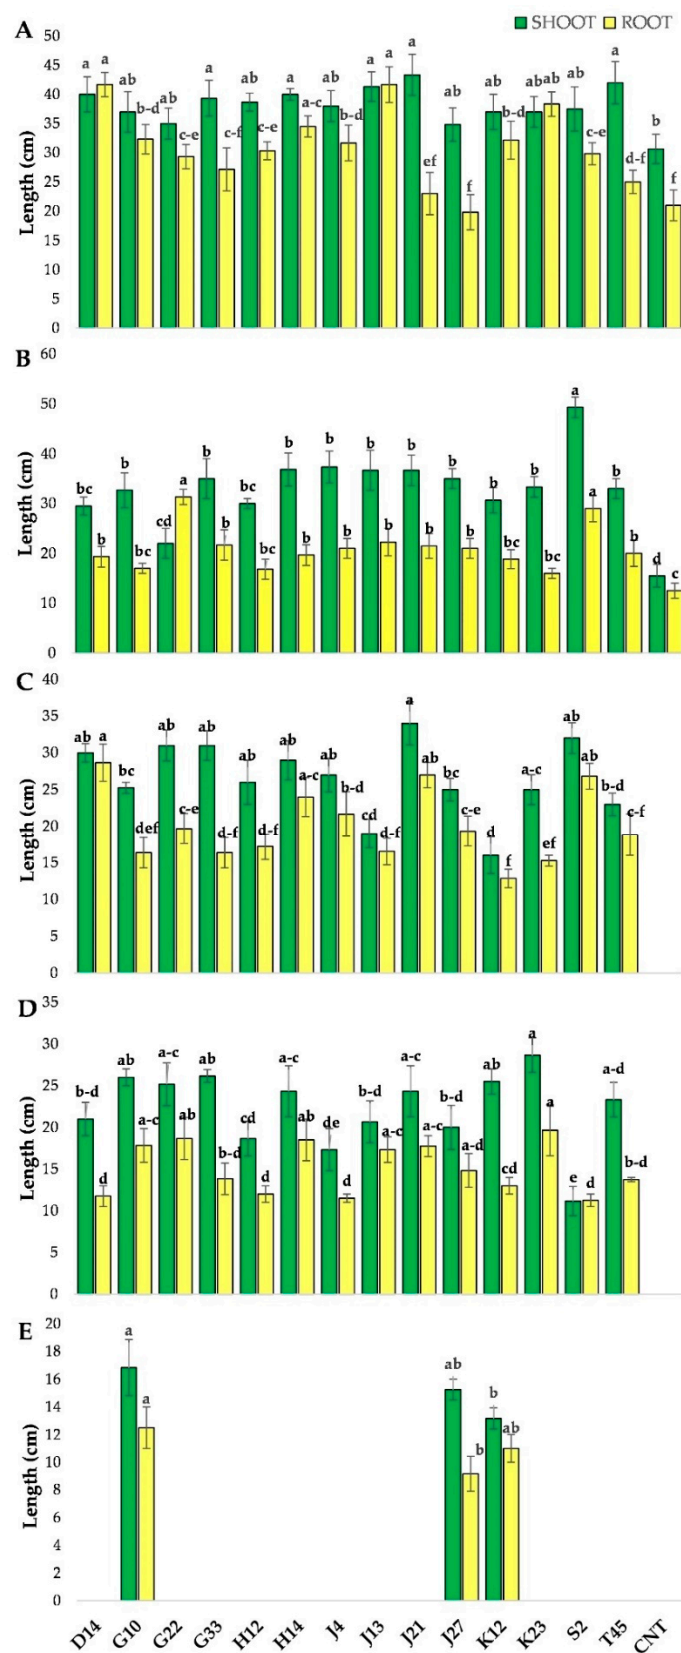

**Figure S1.** Comparison of shoot and root length obtained for the inoculated (D14-T45) and uninoculated plants (CNT) without salt stress induction (A—0 M NaCl L<sup>-1</sup>) and under different salt stress concentrations (B—0.25 M NaCl L<sup>-1</sup>; C—0.5 M NaCl L<sup>-1</sup>; D—0.75 M NaCl L<sup>-1</sup>; E—1 M NaCl L<sup>-1</sup>) (n = 3).

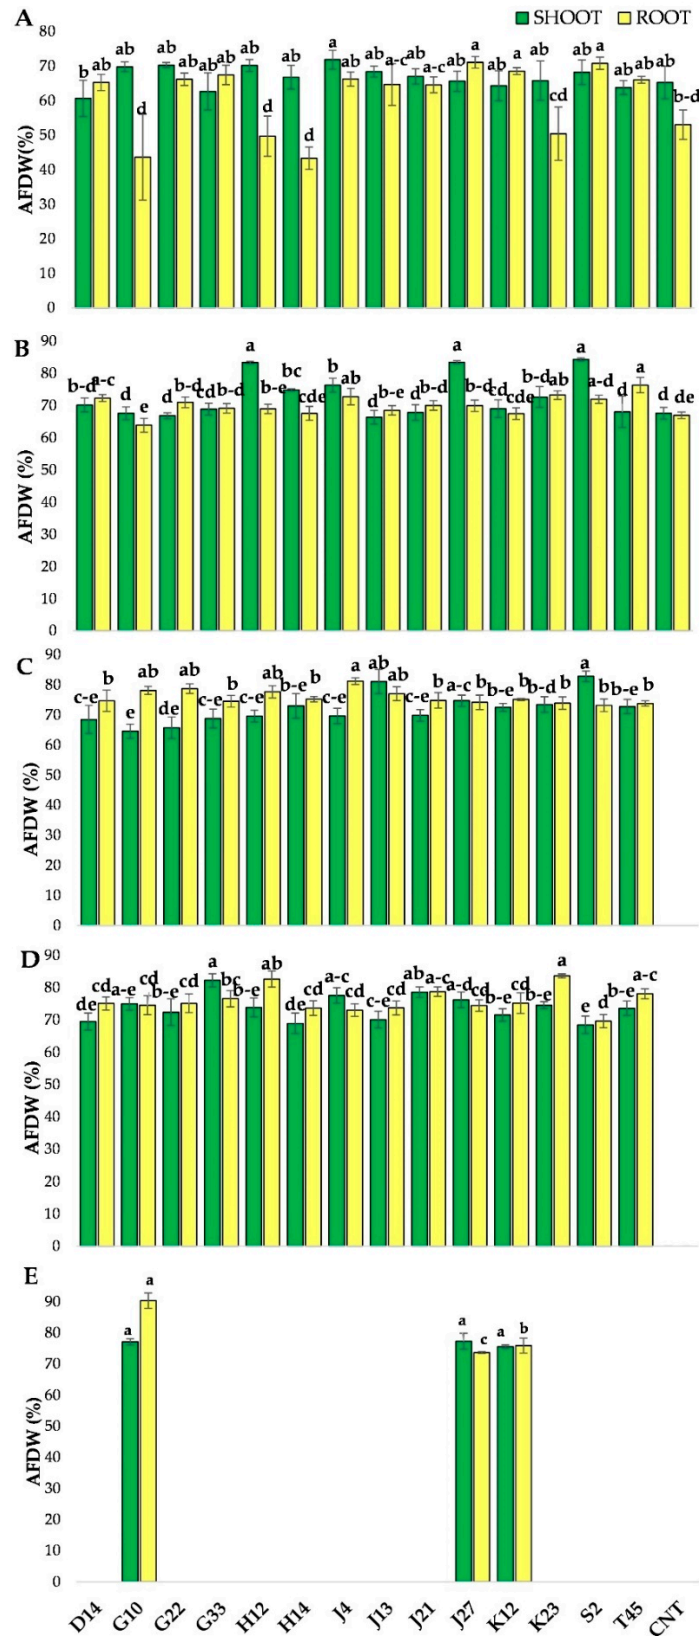

**Figure S2.** Comparison of shoot and root ash-free dry weight (AFDW) obtained for the inoculated (D14-T45) and uninoculated plants (CNT) without salt stress induction (A—0 M NaCl L<sup>-1</sup>) and under different salt stress concentrations (B—0.25 M NaCl L<sup>-1</sup>; C—0.5 M NaCl L<sup>-1</sup>; D—0.5 M NaCl L<sup>-1</sup>; E—0.75 M NaCl L<sup>-1</sup>; F—1 M NaCl L<sup>-1</sup>) (n = 3).

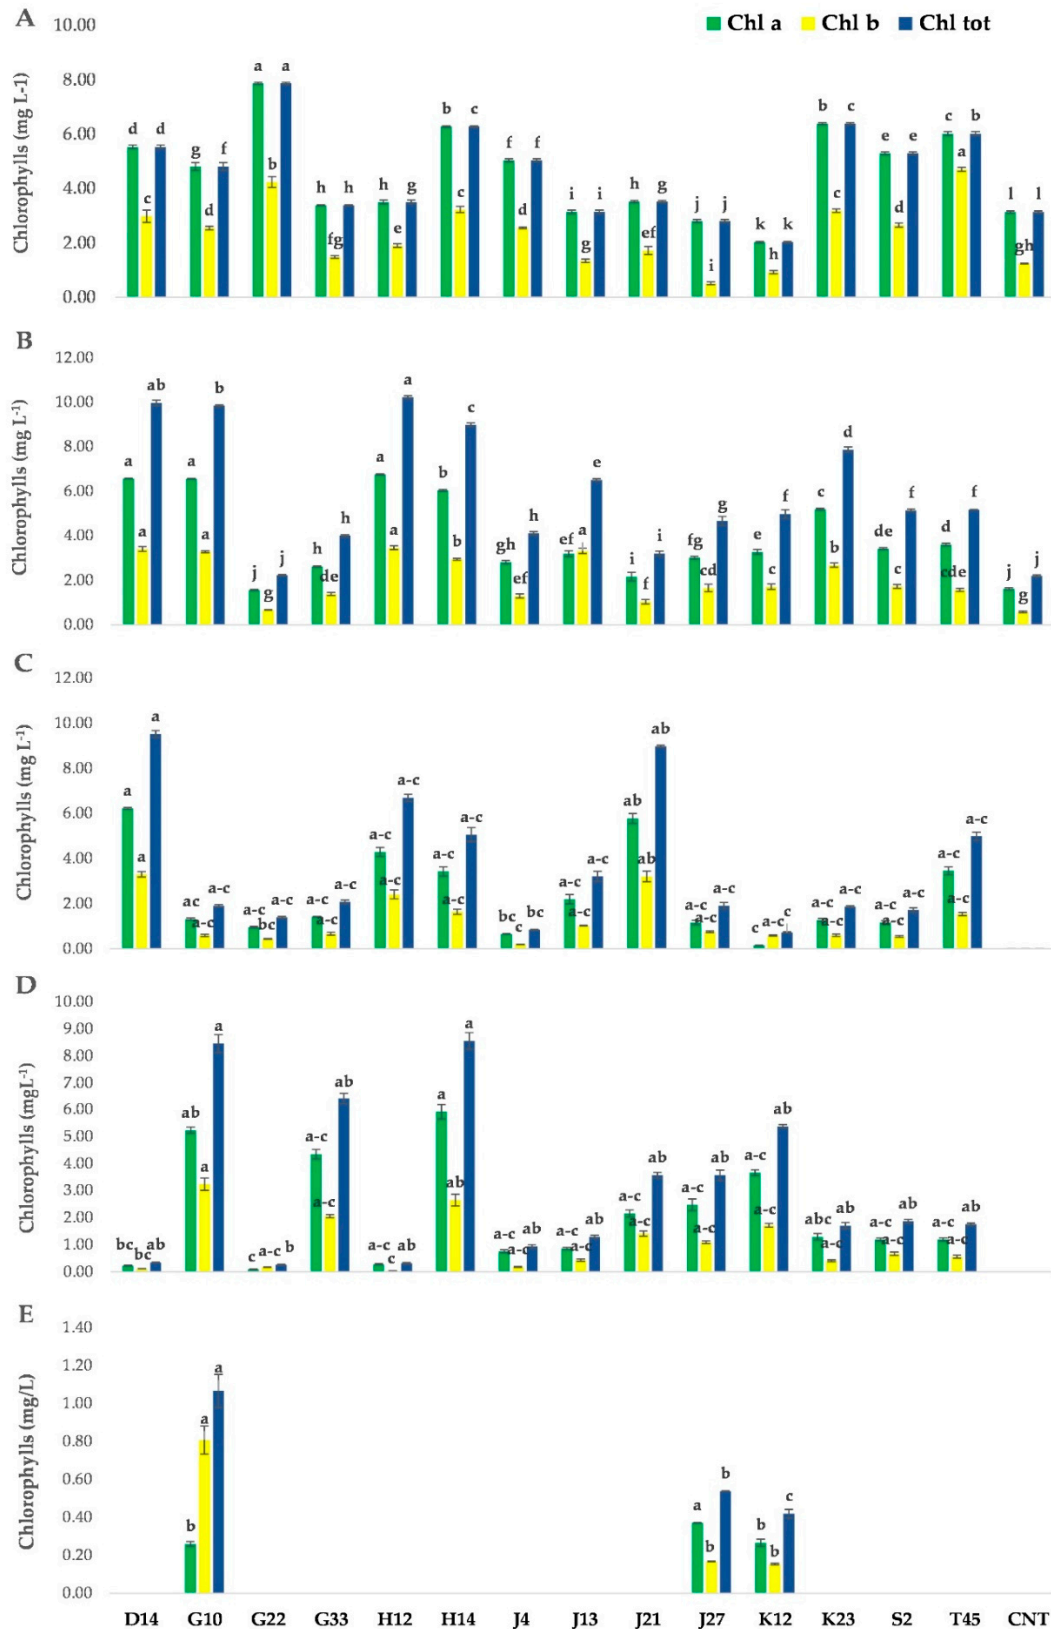

**Figure S3.** Comparison of Chlorophylls a, b and total (Chl a, b and tot) obtained for the inoculated (D14-T45) and uninoculated plants (CNT) without salt stress induction (A–0 M NaCl L<sup>-1</sup>) and under different salt stress concentrations (B–0.25 M NaCl L<sup>-1</sup>; C–0.5 M NaCl L<sup>-1</sup>; D–0.5 M NaCl L<sup>-1</sup>; E–0.75 M NaCl L<sup>-1</sup>; F–1 M NaCl L<sup>-1</sup>) (n = 3).

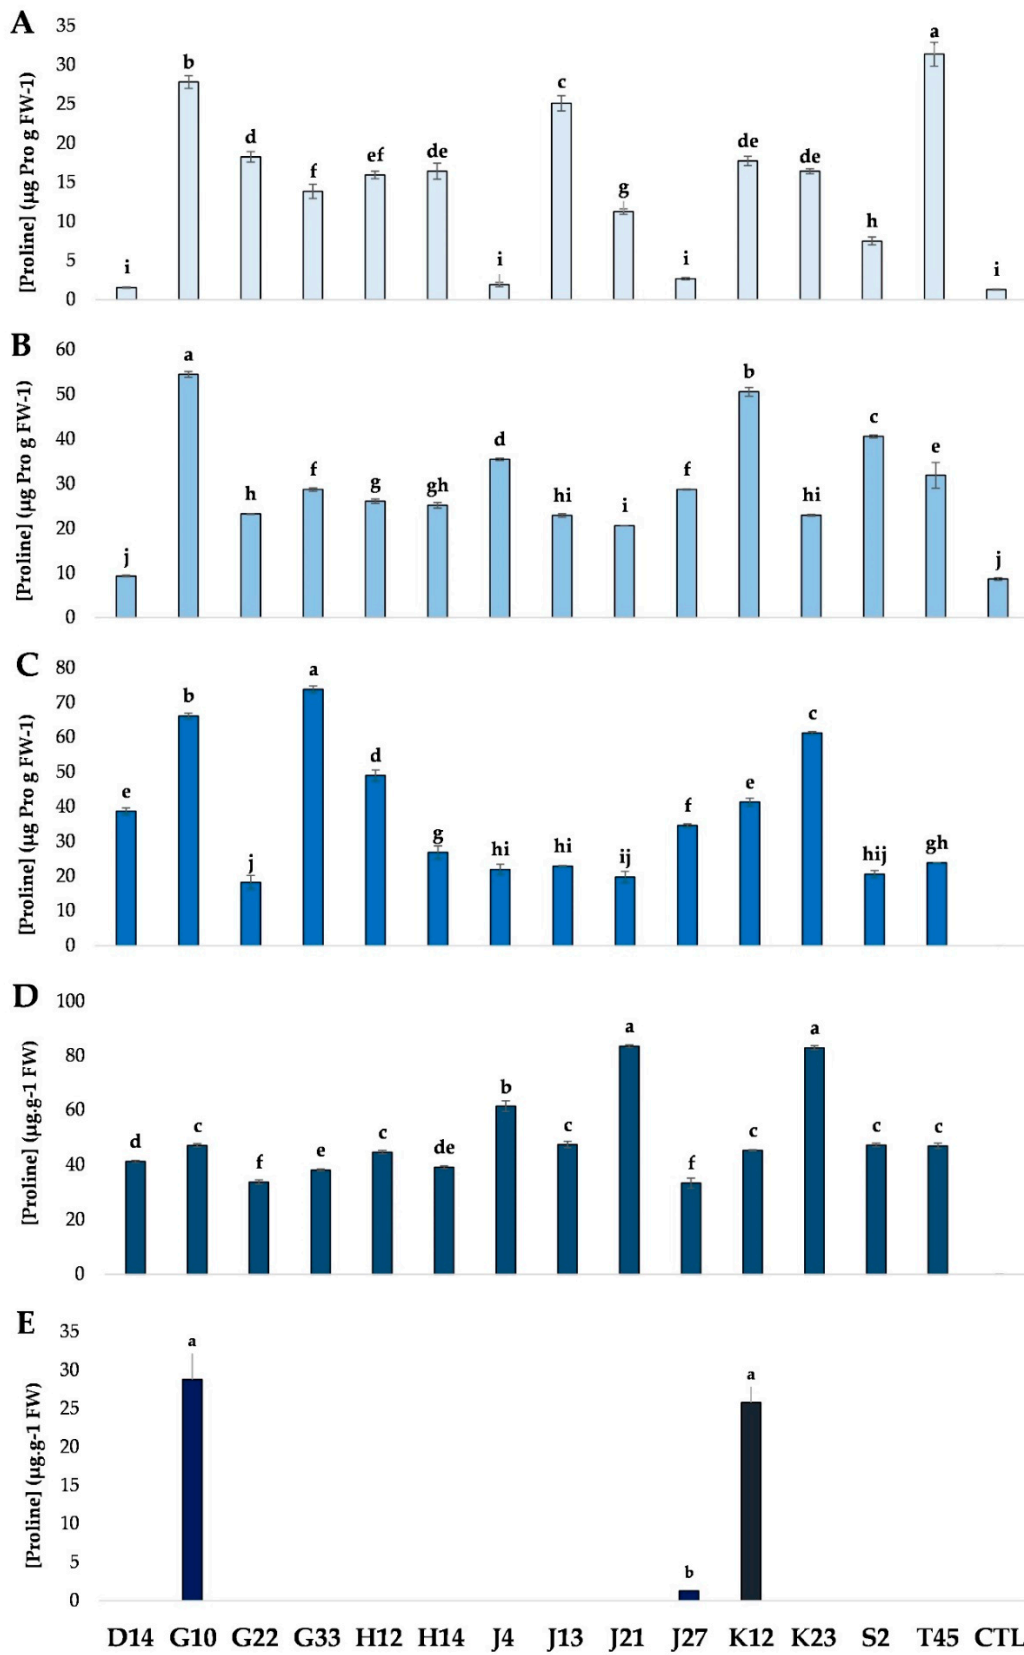

**Figure S4.** Comparison of proline accumulation obtained for the inoculated (D14-T45) and uninoculated plants (CNT) without salt stress induction (A—0 M NaCl L<sup>-1</sup>) and under different salt stress concentrations (B—0.25 M NaCl L<sup>-1</sup>; C—0.5 M NaCl L<sup>-1</sup>; D—0.5 M NaCl L<sup>-1</sup>; E—0.75 M NaCl L<sup>-1</sup>; F—1 M NaCl L<sup>-1</sup>) (n = 3).
